# Supplementary material
Source: publisher site journal article supplement (https://www.dovepress.com/article/309001)
Supplement: Supplementary file 1 [file get_supplementary_file.php]

**Appendix A.** Multiple choice questions

1. A young woman presented to emergency department with a history of nausea, vomiting and dizziness for the last 6 hours. There is no history of deafness or tinnitus. She has just recovered from upper respiratory tract infection. Which one of the following is the most likely diagnosis?

A Posterior circulation stroke
B Labyrinthitis
C Benign paroxysmal positional vertigo
D Meniere’s disease

2. A middle-aged female presented to the emergency department with recurrent episodes of rotational vertigo associated with certain head movements for nearly 7 days. The symptoms get particularly worse and rolling onto the right-hand side. These symptoms lasted for less than a minute. His symptoms are associated with nausea. She denies any hearing impairment or tinnitus. Based on the history which of the following condition is the most likely underlying diagnosis?

A Benign paroxysmal positional vertigo

B Labyrinthitis

C Acoustic neuroma

D Meniere’s disease

3. Which one of the following maneuvers is used for the diagnosis of posterior canal Benign Paroxysmal Positional Vertigo (BPPV)?

A Epley’s maneuver

B Roll maneuver

C Dix-Hallpike maneuver

D Semont maneuver

4. Which semicircular canal is mostly commonly affected in BPPV?

A Anterior canal

B Posterior canal

C Lateral canal

D All canals are equally affected

5. American Academy of Neurology recommends the use of medications for the treatment of BPPV?

A Yes

B No

6. American Academy of Neurology recommends the use of imaging for the diagnosis of BPPV?

A Yes

B No

7. An elderly woman was seen in the balance clinic with a history of recurrent vertigo for 2 weeks. The symptoms started after a fall where she sustained mild head injury. No significant past medical history includes hypertension for which she takes amlodipine 10 mg daily and aspirin 75 mg daily. She also suffers from arthritis of hips and knees; neurological examination was unremarkable. Based on this information what is the likely cause of her symptoms?

A Benign paroxysmal positional vertigo

B peripheral neuropathy

C subdural hematoma

D: Minor head injury/concussion

8. Middle-aged man was brought into the emergency department with a history of persistent vertigo for 2 hours. Vertigo was associated with vomiting and ataxia. He takes bisoprolol 2.5 mg daily to control his atrial fibrillation. The head impulse test was abnormal on the left-hand side. Rest of the neurological examination was unremarkable. He was unable to walk due to severe balance problems. He appears to be falling on one side. Based on the above information the most likely diagnosis is?

A multiple sclerosis

B Posterior circulation stroke

C Meniere’s disease

D Vestibular labyrinthitis

9. Middle-aged man was referred by his family physician to acute medical assessment unit with a few episodes of vertigo lasting for an hour while and associated with numbness of left side of the face and diplopia. Each episode lasts for 10-20 minutes followed by complete resolution of symptoms. Significant past medical history includes smoking for almost 20 years and hypertension. On examination his vital signs were unremarkable the blood pressure was 195/95 and the rest of the examination was unremarkable. Based on the history what is the one most likely diagnosis from the list below?

A intracranial tumor

B Benign paroxysmal positional vertigo

C multiple sclerosis

D Transient ischaemic attack

10**.** A 65-year-old woman was brought into the emergency department with a history of dizziness on looking up particularly when putting the laundry on the washing line. Significant past medical history includes well controlled hypertension. On examination vital signs were within normal range, what is the next test would you to help in confirming the diagnosis?

A Epley maneuver

B Cervical spine X-ray

C MRI brain

D Dix-Hallpike maneuver

11. A 50-year-old woman was referred by her family physician tool the ENT clinic with recurrent history of disabling vertigo for nearly 2 months. The vertigo attacks last for 30 minutes to one hour and she experienced several episodes every month. The attacks are usually associated with oral fullness, tinnitus and deafness. These symptoms resolved spontaneously. Her recent MRI scan in a private hospital and did not reveal any intracranial pathology. Based on the above information what is the most likely diagnosis?

A Benign paroxysmal positional vertigo

B Brain tumor

C Meiners disease

D panic attacks

12. An elderly lady was referred to acute medical assessment unit due to sudden onset of prolonged vertigo episode accompanied with vomiting. She seems to be falling on the left-hand side. Significant past medical history includes non-insulin-dependent diabetes mellitus and hypertension. On examination her vital signs are within normal range, spontaneous nystagmus which is non-fatigable and present in all directions. Head impulse test was abnormal. She was unable to stand and before without any help. Based on the above information what is the most likely diagnosis?

A brain tumor

B epilepsy

C Stroke

D Benign paroxysmal positional vertigo

13. A 55-year-old woman was brought in by the ambulance to the emergency department with severe vertigo attack and associated vomiting. She felt experienced rushing noise is in her left ear before developing vertigo. There was no significant past medical history. On examination vitals signs were unremarkable. She had spontaneous nystagmus, deafness on the hearing test and unremarkable head impulse test. Rest of the examination was unremarkable. Based on the above information what is the underlying pathology?

A Meniere’s syndrome

B Migraine

C Peri lymphatic fistula

D Stroke

14. A 70-year-old was brought in by ambulance to the emergency department following of fall. She explained that she has been having recurrent dizziness symptoms and some of them lead to her fall. The dizziness is associated with the room spinning and starts during certain head movements such as looking up and rolling in the bed. There is no other significant past medical history in part from osteoarthritis in the knee. On examination vital signs are unremarkable. Based on the history what is the recommended management?

A Betahistine

B Epley maneuver

C Referral to psychiatry

D Referral to neurosurgery

15. A 55-year-old was referred emergently to the stroke unit after experiencing a funny turn in the town. She described that her dizziness started with loss of vision associated with feeling faint and dizzy. She experienced 2 episodes in the last 24 hours. Her significant past medical history includes type 2 diabetes, myocardial infarction 5 years ago. Her current medications include metformin, Aspirin, bisoprolol, ramipril, Rest of the examination was unremarkable. Cardiac enzymes and ECG did not reveal any abnormality what is the next more stroke suitable investigation?

A 24 hours blood pressure recording

B Holter monitoring

C Echocardiogram

D CT brain

16. An elderly 80-year-old lady was referred to the medical admission unit by her family physician with recurrent history of falls. She explained that she has had several falls in the last 1 year. Before following she experienced dizziness and leaning to words one side. There was no serious injury during any of these falls. She stated that she feels dizzy all the time. On examination vital signs were within normal range, her vision with glasses was normal and abnormal head impulse test on the right side. Dix-Hallpike test was unremarkable. Based on the above information what is the most likely diagnosis?

A Benign paroxysmal positional vertigo

B Cerebrovascular disease

C Uncompensated vestibular disorder

D Old age dizziness

17. Which one of the following maneuvers used to treat posterior canal BPPV?

A. Epley maneuver

B. Barbecue roll maneuver

18. Physical maneuver for the treatment of BPPV should only be done in a special clinic?

A Yes

B No

19. Recurrence rate of BPPV in the first year is around?

A 30%

B 10%

C 50%

D 75%

20. Which is the well-recognized theory leading for BPPV?

A Canalolithiasis

B Cupulolithiasis
